# Supplementary material for: The View of the French Dog Breeders in Relation to Female Reproduction, Maternal Care and Stress during the Peripartum Period
Source: PubMed Central journal article supplement (PMC7022537; doi:10.3390/ani10010159), 2020-01-17
Supplement: animals-10-00159-s001.pdf [file animals-10-00159-s001.pdf]

# Parturition and Maternal Behaviour Survey

# 2018

## About your kennel

### Contact details

Your name: ....

Your firstname: ....

Name of your breeding facility: ....

Address: .... Postcode: ... City: ....

Phone number:...

Email: ....

Q1 Is your kennel?

*(Please tick as many boxes as apply)*

A family activity.....

A professional activity.....

Other **please specify** .....

---

Q2 How many females (between 1 and 7-years old) are in the reproduction program?

*(Please tick one box only)*

Less than 5.....

6 to 10 .....

11 to 30 .....

31 to 50 .....

More than 50 .....

Q3 How many litters are born per year?

*(Please tick one box only)*

Less than 5.....

6 to 10 .....

11 to 30 .....

31 to 50 .....

More than 50 .....

Q4 Which breeds categories are represented in your kennel? (based on dog breed groups)

(Please tick all boxes that apply)

- Group 1 (Sheepdogs and cattle dogs) .....
- Group 2 (Pinschers/schnauzers/molossoid breeds/Swiss mountain) .....
- Group 3 (Terriers).....
- Group 4 (Dachshunds).....
- Group 5 (Spitz and primitive types).....
- Group 6 (Scenthounds and related breeds).....
- Group 7 (Pointers and setters).....
- Group 8 (Retrievers - flushing dogs - water dogs).....
- Group 9 (Companion and toy dogs).....
- Group 10 (Sighthounds).....

Q5 Which breeds are represented in your kennel?

---

---

---

Q6 Where are your bitches housed most of the time? (apart from parturition period)

(Please tick all boxes that apply)

- Inside the house .....
- In the garden .....
- In a kennel facility.....
- Other **please specify** .....

---

Q7 How often are the bitches in contact with people?

(Please tick one box only)

- All the time or most of the time .....
- Half of the working day.....
- Twice per day .....
- Once per day.....
- Other **please specify** .....

---

**Your breeding program**

**Q8** Do you use any technique to estimate the breeding time?

*(Please tick all boxes that apply)*

- Vaginal smear .....
- Progesterone level .....
- Measurement of electrical conductivity of vaginal mucus .....
- Other **please specify** .....

\_\_\_\_\_

**Q9** How do you estimate the whelping time?

*(Please tick as many boxes as apply)*

- No specific technic .....
- I use the last day of breeding .....
- I use the ovulation time .....
- Body temperature .....
- Bitch's behaviour change .....

**please specify:** \_\_\_\_\_

**Q10** Once the bitch is confirmed pregnant what are the changes in the housing?

*(Please tick one box only)*

- No changes .....
- Same housing but introduction of a whelping box .....
- Change to the maternity area before parturition .....
- Other **please specify** .....

**Q11** During the time in the maternity, do the bitches have access to an exercise area ?

*(Please tick one box only)*

- Yes .....
- No .....

**Q12** During the time in the maternity, does the housing system allow the bitch to?

*(Please tick one box only)*

- Access outside all the time .....
- Leave the maternity twice/day .....
- Leave the maternity once/day .....
- Other .....

**please specify:** \_\_\_\_\_

**At parturition**

Q13 What is the most common time of whelping for your bitches?

*(Please tick one box only)*

- in the morning - from 06:00 to 12:00.....
- in the afternoon - from 12:00 to 18:00 .....
- in the evening - from 18:00 to midnight.....
- At nighttime - from midnight to 06:00.....

Q14 How do you monitor the whelping?

*(Please tick one box only)*

- I stay close to my bitch.....
- I have a trainee staying with the bitch .....
- Camera monitoring.....
- Acoustic surveillance system .....
- No observation.....
- Other.....

**please specify:** \_\_\_\_\_

**Maternal behaviour at whelping time**

Q15 When do you consider a bitch very stressed at the time of whelping?

*(Please tick as many boxes as apply)*

- The bitch moves abnormally frequently.....
- The bitch barks and/or makes other sounds .....
- The bitch tries refuses to enter the whelping box.....
- The bitch tries to tear off the whelping box.....
- The bitch is aggressive towards people.....
- The bitch is aggressive towards other dogs/bitches .....
- Other important behaviour **please specify**.....

\_\_\_\_\_

Q16 What are the signs of a non-stressed bitch during whelping for you?

*(Please tick as many boxes as apply)*

- Isolating and searching for a quiet place .....
- Looking for human contact .....
- Sitting in the whelping box.....
- Happy barking.....
- Other important behaviour **please specify**.....

Q17 Do you use products or methods to reduce the stress of the bitch around whelping?

(Please tick as many boxes as apply)

- I spend more time with the bitch.....
  - I use natural products (pheromones, Bach flowers, natural ingredients...)..
  - I play music in the maternity.....
  - None .....
  - Others.....
- If you selected "Others" or "natural products" **please specify:** \_\_\_\_\_

Q18 If you're using products or methods to reduce the stress of the bitch around whelping, is it?

(Please tick as many boxes as apply)

- Occasional, when a bitch is identified as stressed.....
- Systematic, preventatively.....

**Maternal behaviour after whelping**

Q19 How much time do bitches usually need to adjust to maternal role?

(Please tick one box only)

- Right after puppies' birth.....
- 1 or 2 days after puppies' birth.....
- One week after puppies' birth .....
- Two to four weeks .....
- More than a month.....

Q20 What are the signs of a bitch stressed by motherhood?

(Please tick as many boxes as apply)

- The bitch refuses to stay with her puppies.....
  - The bitch often moves her puppies to different places.....
  - The bitch refuses to let her puppies nurse .....
  - The bitch is aggressive towards the puppies (grunt and bite).....
  - The bitch prefers to be with humans .....
  - Other **please specify**.....
- \_\_\_\_\_

Q21 When a bitch is stressed after whelping, do you use products or methods to reduce her stress?

(Please tick as many boxes as apply)

- I spend more time with the bitch.....
  - I use natural products (pheromones, Bach flowers, natural ingredients...)..
  - I play music in the maternity.....
  - None .....
  - Others.....
- If you selected "Others" or "natural products" **please specify:** \_\_\_\_\_

Q22 If you're using products or methods to reduce the stress of the bitch after whelping, is it?

(Please tick as many boxes as apply)

- Occasional, when a bitch is identified as stressed.....
- Systematic, preventatively.....

Q23 Which of the following behaviour(s) are observed around parturition in most of your bitches?

(Please tick as many boxes as apply)

- Nesting .....
- Eating the placenta.....
- Licking the puppies.....
- Walking in circles.....
- Transporting the puppies with the mouth to different places.....
- Laying down and standing up multiple times.....
- Frequent barking .....
- Loud crying.....
- Other .....

**please specify:** \_\_\_\_\_

Q24 Behaviour problems are more common?

(Please tick one box only)

- At the first parturition .....
- At the second parturition and beyond.....
- Not applicable, I never experienced any problem .....

Q25 Do your bitches growl if someone but you approaches the nest?

(Please tick one box only)

- Yes .....
- No.....

Q26 Do your bitches allow someone but you manipulate their puppies?

(Please tick one box only)

- Yes .....
- No .....

Q27 Do your bitches prefer your presence to their puppies?

(Please tick one box only)

- Yes .....
- No .....

Q28 Do you consider bitches to display a more maternal attitude?

(Please tick one box only)

- At the first parturition .....
- At the second parturition and beyond .....
- No difference .....

Q29 How often do you have problems such as a bitch refusing her puppies?

(Please tick one box only)

- Never .....
- Sporadically -10 to 30% of the whelping .....
- Regurlary – 30 to 50% of the whelping .....
- Frequently – 50 to 70% of the whelping .....
- Most of the whelpings > 70% .....

Q30 How often do you have problems such as a bitch eating one or several puppies (cannibalism)?

(Please tick one box only)

- Never .....
- Sporadically -10 to 30% of the whelping .....
- Regurlary – 30 to 50% of the whelping .....
- Frequently – 50 to 70% of the whelping .....
- Most of the whelpings > 70% .....

Q31 How often do you have problems such as a bitch with no lactation?

(Please tick one box only)

- Never .....
- Sporadically -10 to 30% of the whelping .....
- Regurlary – 30 to 50% of the whelping .....
- Frequently – 50 to 70% of the whelping .....
- Most of the whelpings > 70% .....

Q32 In general, the bitch will stay with her puppies for?

(Please tick one box only)

- 4 weeks .....
- 5 weeks .....
- 6 weeks .....
- 7 weeks .....
- 8 weeks .....
- ≥ 9 weeks .....

Q33 A maternal bitch?

(Please tick as many boxes as apply)

- is friendly with her puppies all the time .....
- is protective and does not allow to approach her puppies .....
- licks often her puppies .....
- nurses their puppies frequently .....
- stays with her puppies and refuses to leave the nest .....
- No particular clue of a “good maternal behaviour” in a bitch .....
- Other important behaviour **please specify** .....

**Maternal behaviour in general**

Q34 Please describe any behaviour of the bitch towards their puppies that you consider as THE MOST important

---

---

---

---

**Q35** What are, for you, abnormal behaviours from a bitch towards puppies?

---

---

**Q36** If you're raising several breeds, have you noticed differences in maternal behaviour according to breed? Please provide details.

---

---

Thanks again for your time and willingness to help us with these questions.
